# Supplementary material for: Patient characteristics and pharmacologic treatment patterns in antifibrotic-treated patients with fibrosing interstitial lung diseases: real-world results from a claims database
Source: Springer Nature journal article supplement (doi:10.1186/s12890-025-03713-x), 2025-05-22
Supplement: MOESM2 [file 12890_2025_3713_MOESM2_ESM.pdf]

**Supplementary Figure S1.** Schematic of the study design for (A) patients with IPF; (B) patients with SSc-ILD; and (C) patients with PPF.

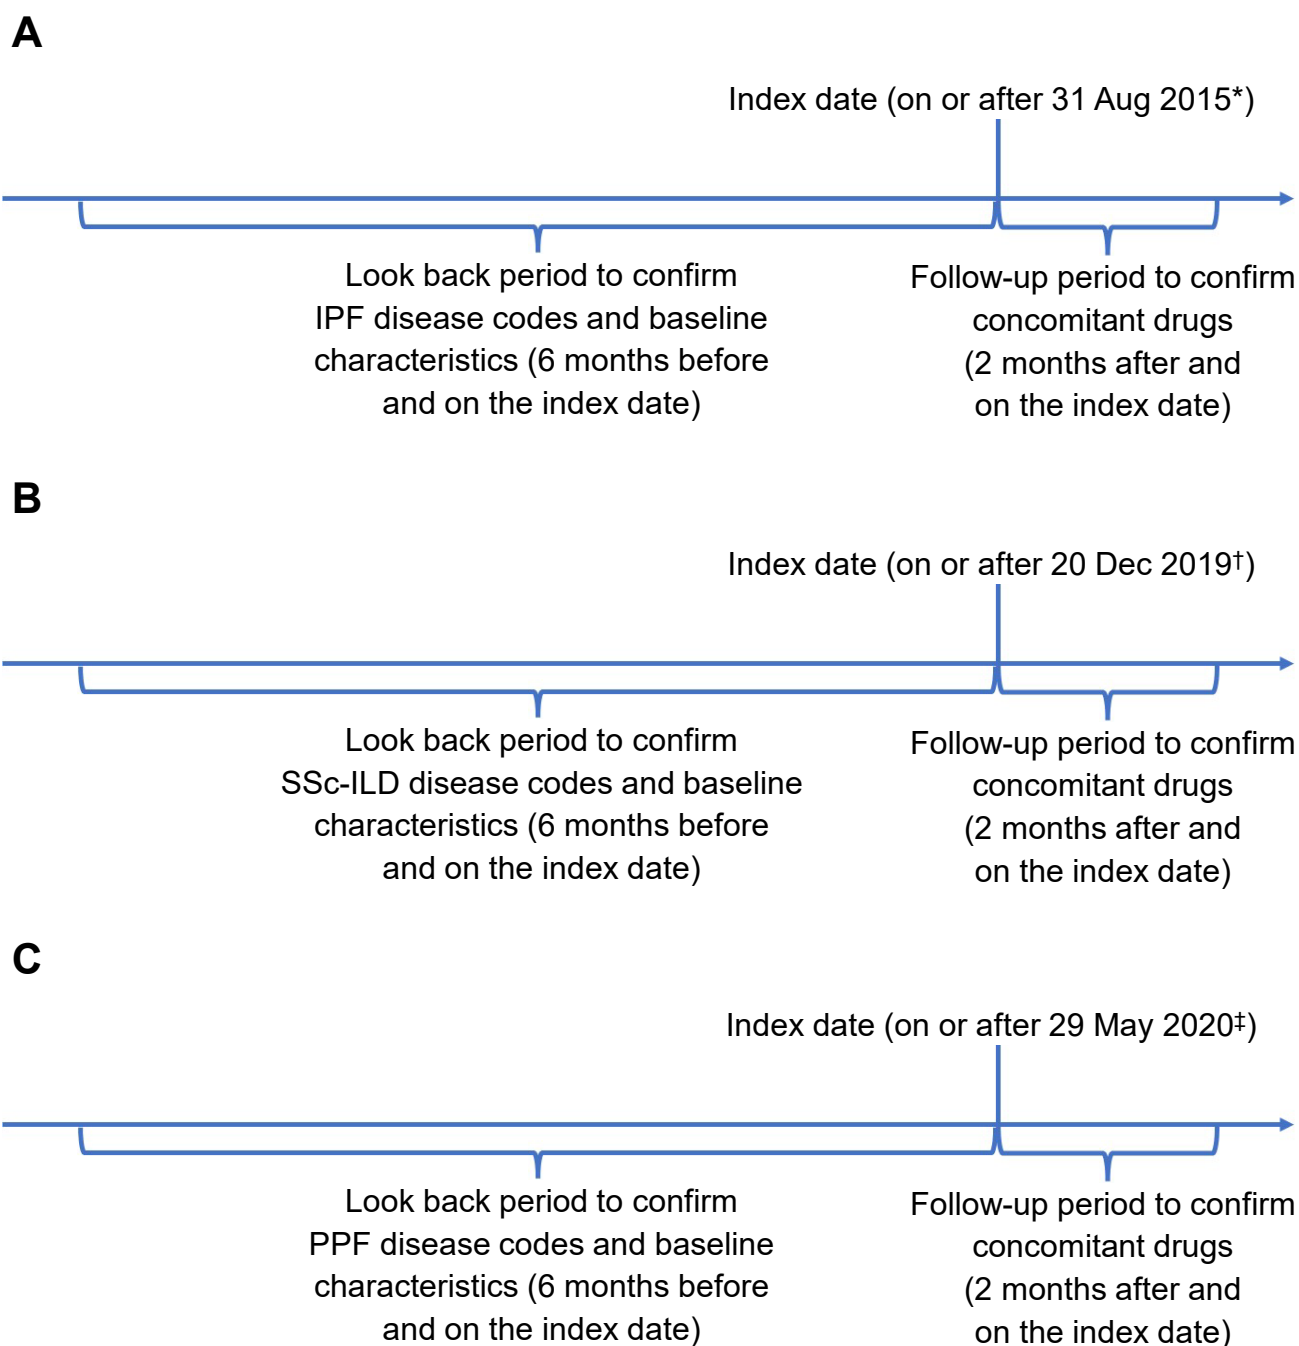

\*The date nintedanib became commercially available. †The date nintedanib was approved for SSc-ILD. ‡The date nintedanib was approved for PF-ILD.

CTD, connective tissue disease; IPF, idiopathic pulmonary fibrosis; PF-ILD, progressive fibrosing-interstitial lung disease; PPF, progressive pulmonary fibrosis; SSc-ILD; systemic sclerosis-interstitial lung disease.

**Supplementary Figure S2.** Patient flow diagram for **(A)** nintedanib users in patients with IPF; **(B)** pirfenidone users in patients with IPF; **(C)** nintedanib users in patients with PPF; **(D)** users of oral and IV glucocorticoids/immunosuppressive drugs/DMARDs for ILD treatment in patients with PPF; **(E)** nintedanib users in patients with SSc-ILD; and **(F)** users of oral and IV glucocorticoids/immunosuppressive drugs/DMARDs for ILD treatment in patients with SSc-ILD.

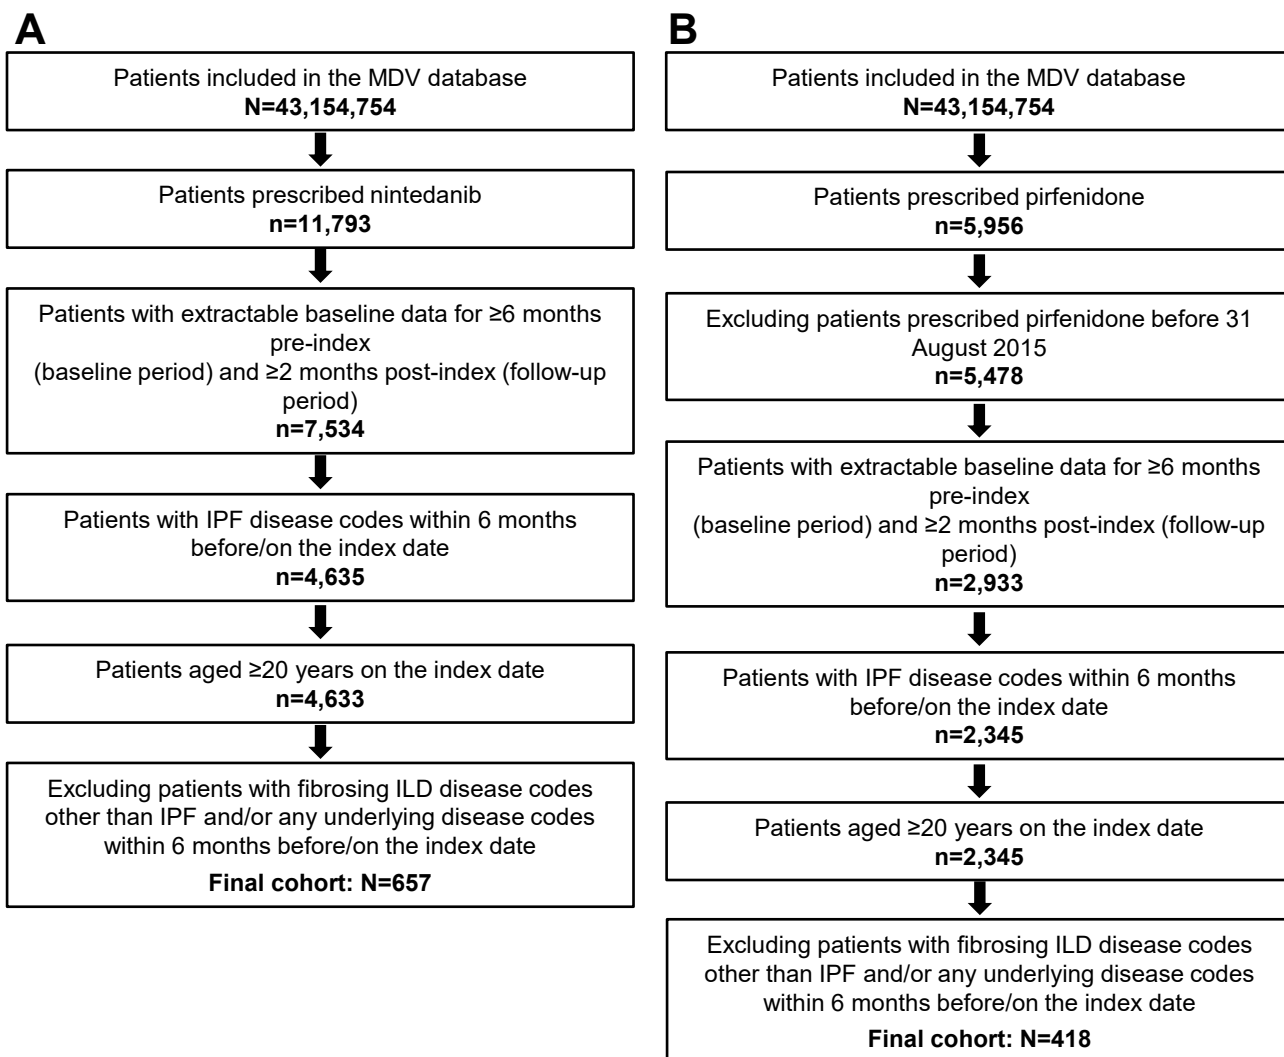

**C**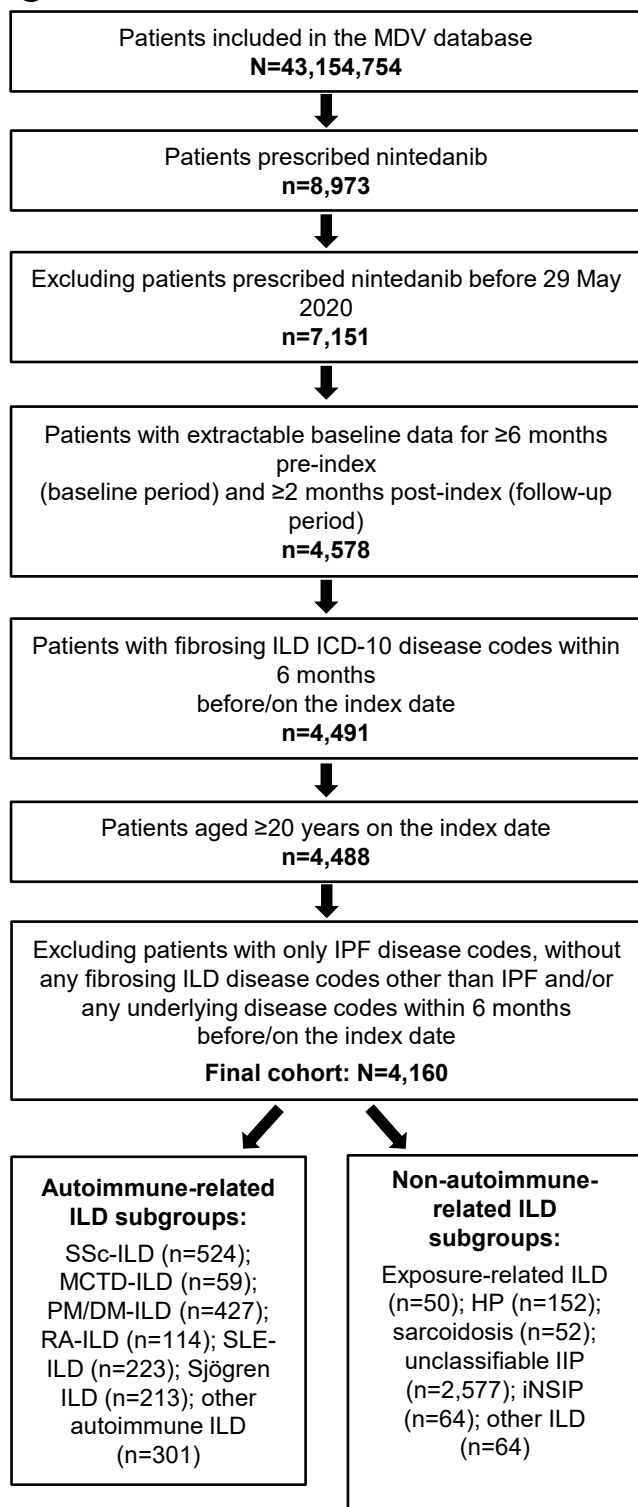**D**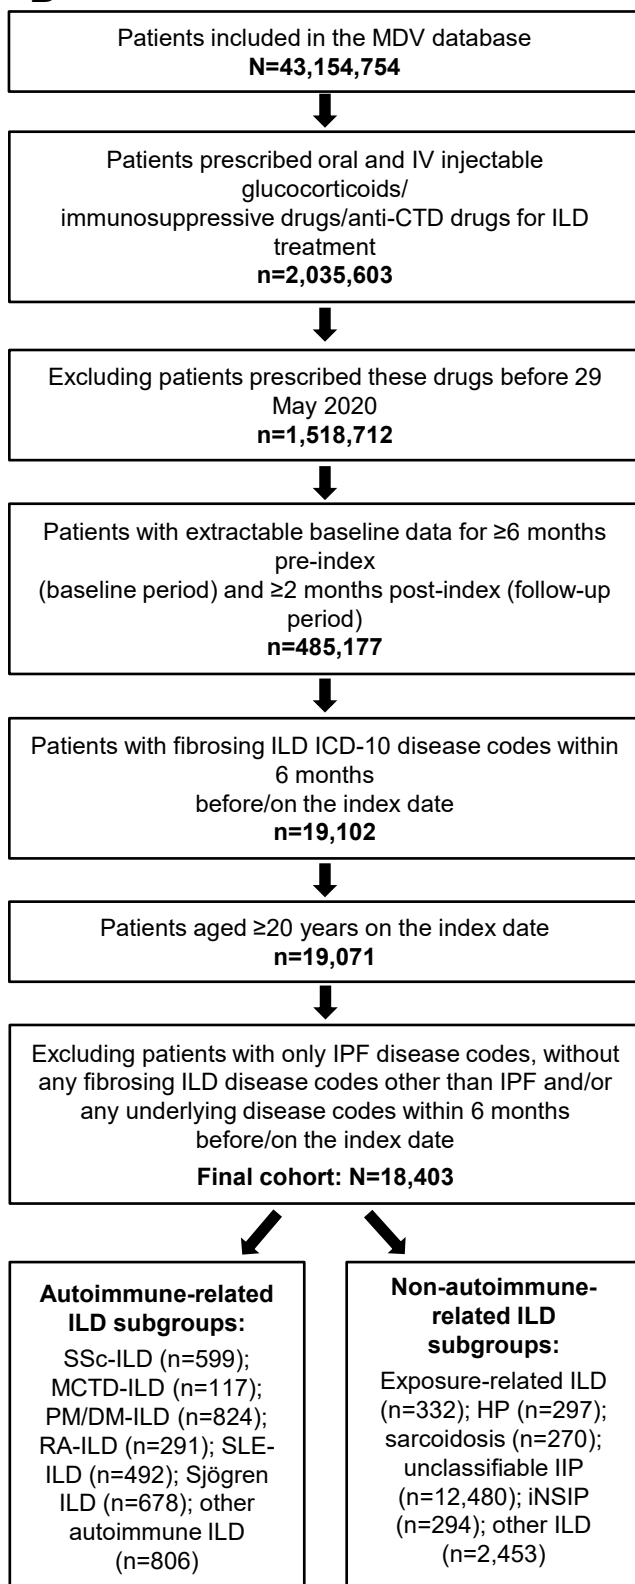

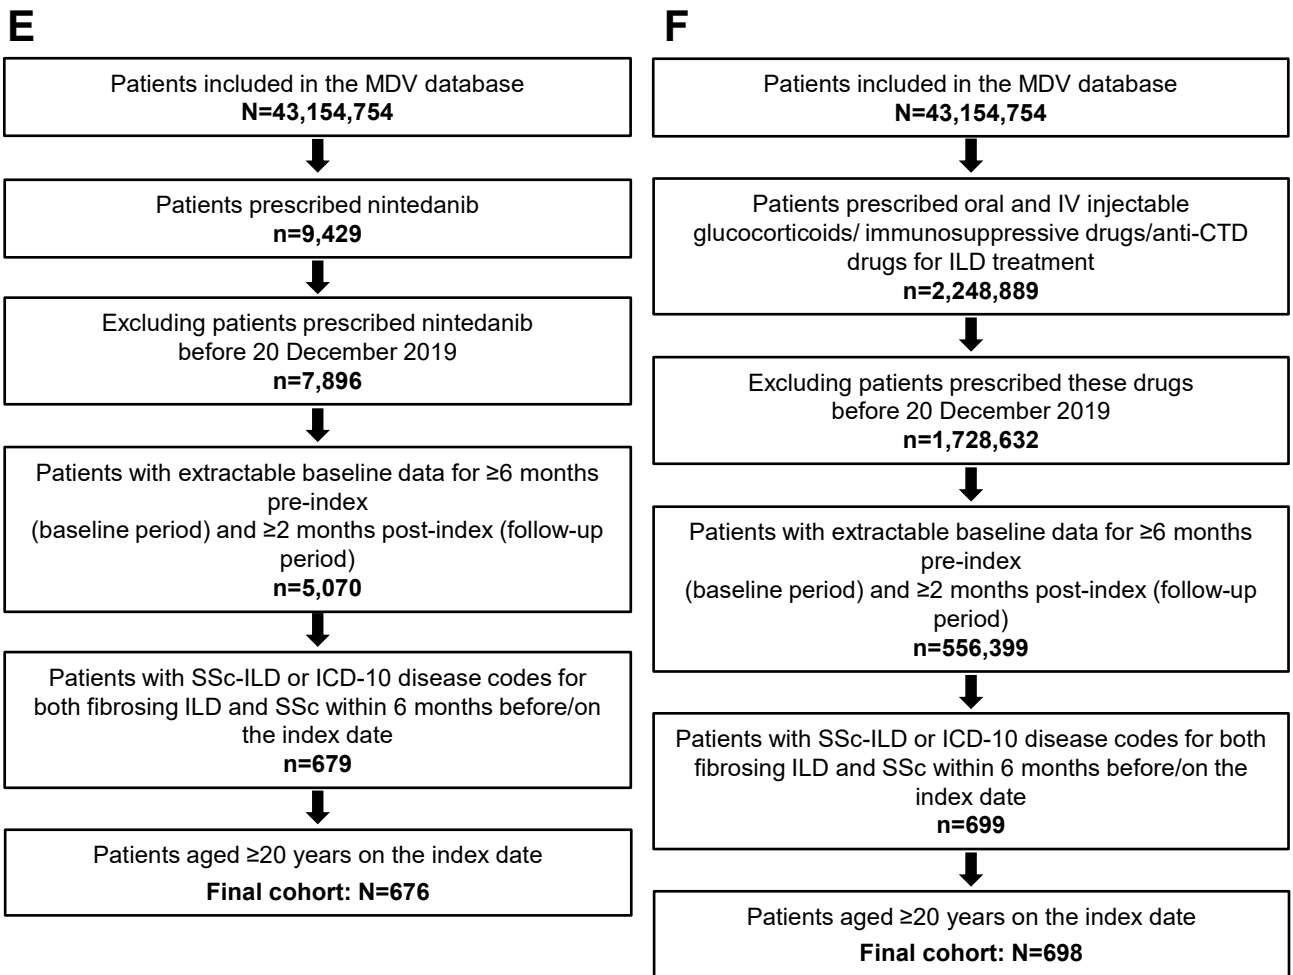

CTD, connective tissue disease; HP, hypersensitivity pneumonitis; ICD-10, International Classification of Diseases-10<sup>th</sup> Revision; IIP, idiopathic interstitial pneumonia; ILD, interstitial lung disease; INSIP, idiopathic nonspecific interstitial pneumonia; IPF, idiopathic pulmonary fibrosis; IV, intravenous; MCTD, mixed connective tissue disease; MDV, Medical Data Vision; PM/DM, polymyositis/dermatomyositis; PPF, progressive pulmonary fibrosis; RA, rheumatoid arthritis; SLE, systemic lupus erythematosus; SSc, systemic sclerosis.

**Supplementary Figure S3.** Number of drugs for ILD treatment concomitant with antifibrotics at the time of initiation of antifibrotic treatment by underlying disease.

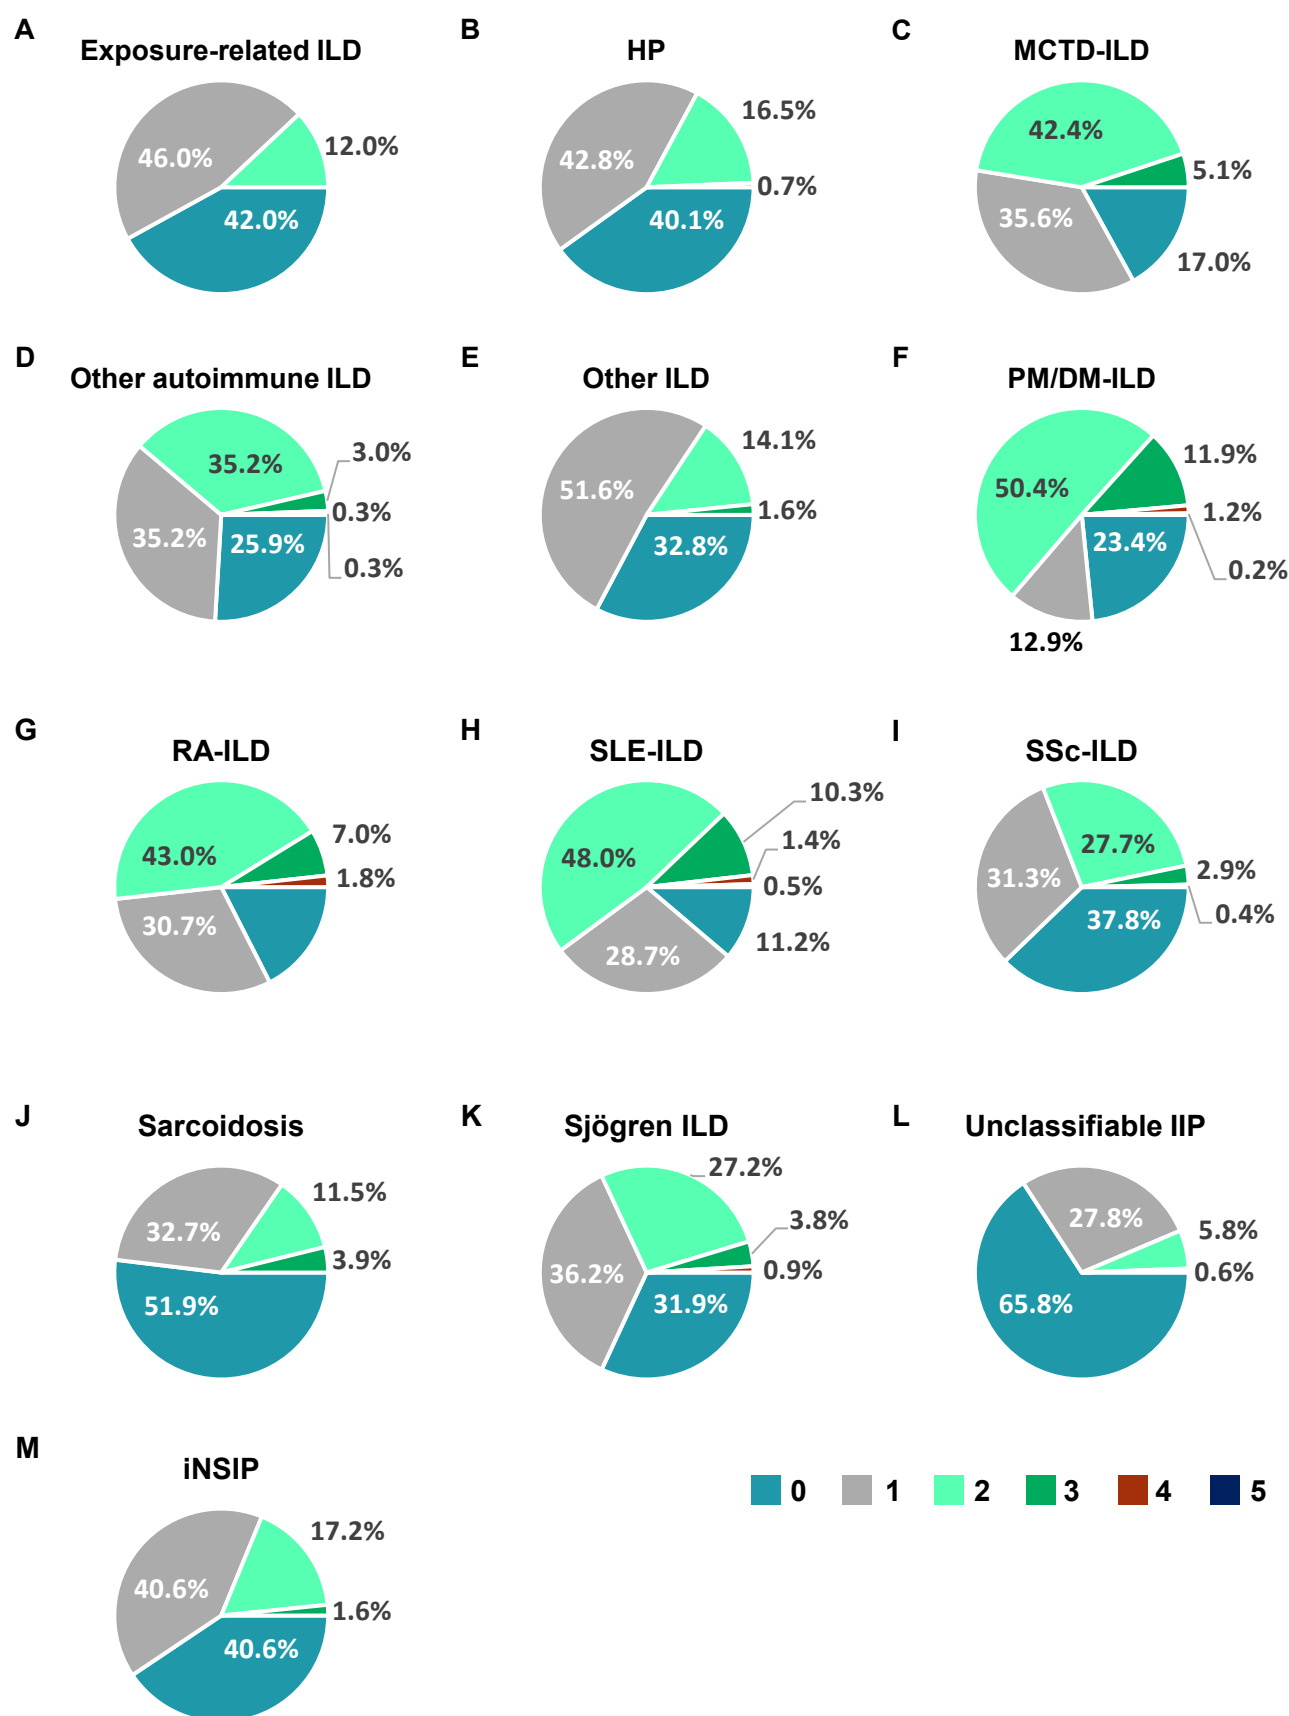

| Statistic    | Nintedanib users in patients with PPF |             |            |                       |             |           |            |
|--------------|---------------------------------------|-------------|------------|-----------------------|-------------|-----------|------------|
|              | Exposure-related ILD                  | HP          | MCTD-ILD   | Other auto-immune ILD | Other ILD   | PM/DM-ILD | RA-ILD     |
| Mean (SD)    | 0.70 (0.68)                           | 0.78 (0.74) | 1.4 (0.83) | 1.2 (0.89)            | 0.84 (0.72) | 1.6 (1.0) | 1.5 (0.92) |
| Median (IQR) | 1 (0–1)                               | 1 (0–1)     | 1 (1–2)    | 1 (0–2)               | 1 (0–1)     | 2 (1–2)   | 2 (1–2)    |

| Statistic    | Nintedanib users in patients with PPF |             |             |             |                    |             |
|--------------|---------------------------------------|-------------|-------------|-------------|--------------------|-------------|
|              | SLE-ILD                               | SSc-ILD     | Sarcoidosis | Sjögren ILD | Unclassifiable IIP | iNSIP       |
| Mean (SD)    | 1.6 (0.90)                            | 0.97 (0.90) | 0.67 (0.83) | 1.1 (0.91)  | 0.41 (0.63)        | 0.80 (0.78) |
| Median (IQR) | 2 (1–2)                               | 1 (0–2)     | 0 (0–1)     | 1 (0–2)     | 0 (0–1)            | 1 (0–1)     |

HP, hypersensitivity pneumonitis; IIP, idiopathic interstitial pneumonia; ILD, interstitial lung disease; iNSIP, idiopathic nonspecific interstitial pneumonia; IPF, idiopathic pulmonary fibrosis; IQR, interquartile range; MCTD, mixed connective tissue disease; PM/DM, polymyositis/dermatomyositis; RA, rheumatoid arthritis; SD, standard deviation; SLE, systemic lupus erythematosus; SSc, systemic sclerosis.

**Supplementary Figure S4.** Number of drugs for ILD treatment prior to the initiation of antifibrotics by underlying disease..

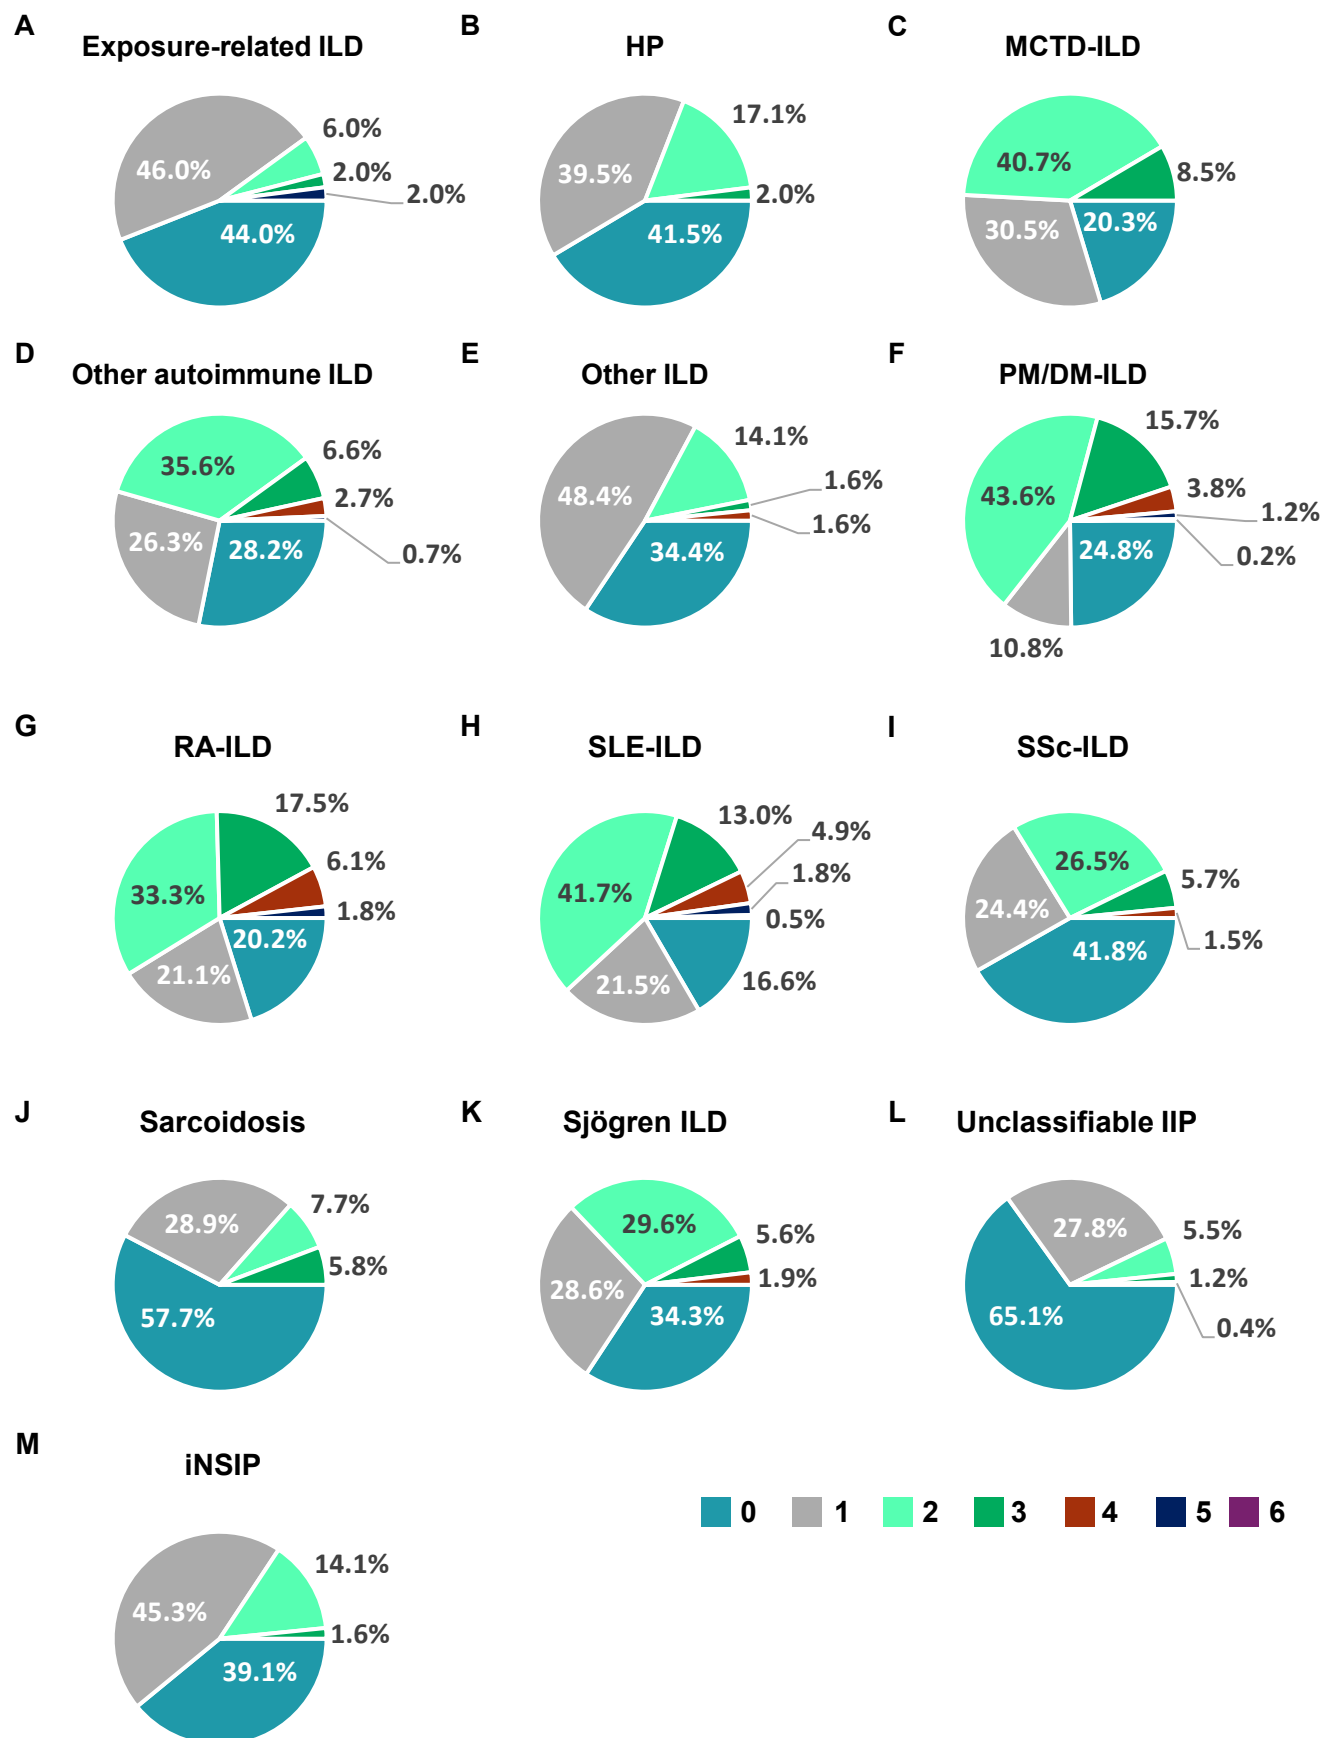

| Statistic    | Nintedanib users in patients with PPF |                |            |                       |             |           |            |
|--------------|---------------------------------------|----------------|------------|-----------------------|-------------|-----------|------------|
|              | Exposure-related ILD                  | HP             | MCTD-ILD   | Other auto-immune ILD | Other ILD   | PM/DM-ILD | RA-ILD     |
| Mean (SD)    | 0.74 (0.92)                           | 0.80<br>(0.79) | 1.4 (0.91) | 1.3 (1.1)             | 0.88 (0.83) | 1.7 (1.2) | 1.7 (1.2)  |
| Median (IQR) | 1 (0–1)                               | 1 (0–1)        | 1 (1–2)    | 1 (0–2)               | 1 (0–1)     | 2 (1–2)   | 2 (1–2.75) |

| Statistic    | Nintedanib users in patients with PPF |           |             |             |                    |             |
|--------------|---------------------------------------|-----------|-------------|-------------|--------------------|-------------|
|              | SLE-ILD                               | SSc-ILD   | Sarcoidosis | Sjögren ILD | Unclassifiable IIP | iNSIP       |
| Mean (SD)    | 1.8 (1.2)                             | 1.0 (1.0) | 0.62 (0.87) | 1.1 (1.0)   | 0.44 (0.69)        | 0.78 (0.74) |
| Median (IQR) | 2 (1–2)                               | 1 (0–2)   | 0 (0–1)     | 1 (0–2)     | 0 (0–1)            | 1 (0–1)     |

HP, hypersensitivity pneumonitis; IIP, idiopathic interstitial pneumonia; ILD, interstitial lung disease; iNSIP, idiopathic nonspecific interstitial pneumonia; IPF, idiopathic pulmonary fibrosis; IQR, interquartile range; MCTD, mixed connective tissue disease; PM/DM, polymyositis/dermatomyositis; RA, rheumatoid arthritis; SD, standard deviation; SLE, systemic lupus erythematosus; SSc, systemic sclerosis.
